# Supplementary material
Source: publisher figshare collection journal article supplement (https://karger.figshare.com/ndownloader/files/33002822)
Supplement: Supplementary file 1 [file 33002822]

**Supplementary Table B. Head computed tomography performed by country***

| **Country** | **N, %** | **P value^** |
| --- | --- | --- |
| Australia | 149, 26.1% | <0.001 |
| Turkey | 36, 20.3% |
| New Zealand | 33, 30.6% |
| Singapore | 15, 14.2% |
| United Kingdom | 27, 31.4% |
| France | 17, 50.0% |

* Only countries that contributed more than 100 cases of headache are included

^ Pearson’s chi-squared test
